# Supplementary material for: Nanoparticles Codelivering mRNA and SiRNA for Simultaneous Restoration and Silencing of Gene/Protein Expression In Vitro and In Vivo
Source: PubMed Central journal article supplement — ACS Nanosci Au. 2024 Nov 15;4(6):416–25. doi: 10.1021/acsnanoscienceau.4c00040 (PMC11659891; doi:10.1021/acsnanoscienceau.4c00040), 2024-11-15
Supplement: ng4c00040_si_001.pdf [file ng4c00040_si_001.pdf]

# **Nanoparticles co-delivering mRNA and siRNA for simultaneous restoration and silencing of gene/protein expression *in vitro* and *in vivo***

Shireesha Manturthi<sup>1,3,4&</sup>, Sara El-Sahli<sup>2,4,5&</sup>, Yuxia Bo<sup>1,2,3</sup>, Emma Durocher<sup>1,3,4,5</sup>,  
Melanie Kirkby<sup>2,4,5</sup>, Alyanna Popatia<sup>2,4,5</sup>, Karan Mediratta<sup>2,4,5</sup>, Redaet Daniel<sup>2,4,5</sup>,  
Seung-Hwan Lee<sup>2,4,5</sup>, Umar Iqbal<sup>6</sup>, Marceline Côté<sup>2,4,5</sup>, Lisheng Wang<sup>2,4,5\*</sup>, Suresh  
Gadde<sup>1,3,4,5,7\*</sup>

1. Department of Cellular and Molecular Medicine, Faculty of Medicine, University of Ottawa, Ottawa, ON K1H 8M5, Canada
2. Department of Biochemistry Microbiology and Immunology, Faculty of Medicine, University of Ottawa, Ottawa, ON K1H 8M5, Canada
3. Kidney Research Centre, Ottawa Hospital Research Institute, Ottawa, ON K1H 8L6, Canada
4. Ottawa Institute of Systems Biology, Faculty of Medicine, University of Ottawa, Ottawa, ON K1H 8M5, Canada
5. Centre for Infection, Immunity, and Inflammation, Faculty of Medicine, University of Ottawa, Ottawa, ON K1H 8M5, Canada
6. Human Health Therapeutics Research Centre, National Research Council Canada, Ottawa, ON K1A 0R6, Canada
7. Ottawa-Carleton Institute for Biomedical Engineering (OCIBME), Ottawa, ON K1S 5B6, Canada

& Contributed equally

\*Corresponding Authors

Suresh Gadde, [Suresh.Gadde@uottawa.ca](mailto:Suresh.Gadde@uottawa.ca)  
Lisheng Wang, [Lisheng.Wang@uottawa.ca](mailto:Lisheng.Wang@uottawa.ca)

## Supplementary information

|                                                                                                   |             |
|---------------------------------------------------------------------------------------------------|-------------|
| PEI-C <sub>14</sub> synthesis.....                                                                | Figure S1   |
| PEI-C <sub>14</sub> H-NMR characterization.....                                                   | Figure S2   |
| Cy5-siRNA+EGFP-mRNA-NPs characterization.....                                                     | Figure S3   |
| PDI of all NPs.....                                                                               | Figure S4   |
| Flow cytometry analysis of Cy5 and EGFP expression in HT1080 .....                                | Figure S5-7 |
| Flow cytometry analysis of GFP knockdown in GFP+ cells with single and dual-drug NPs .....        | Figure S8-9 |
| Percentage (quantitative graph) of GFP knockdown in GFP+ cells with single and dual-drug NPs..... | Figure S10  |
| Luciferase analysis with single-drug and dual-drug NPs in GFP+ and GFP- cells respectively .....  | Figure S11  |

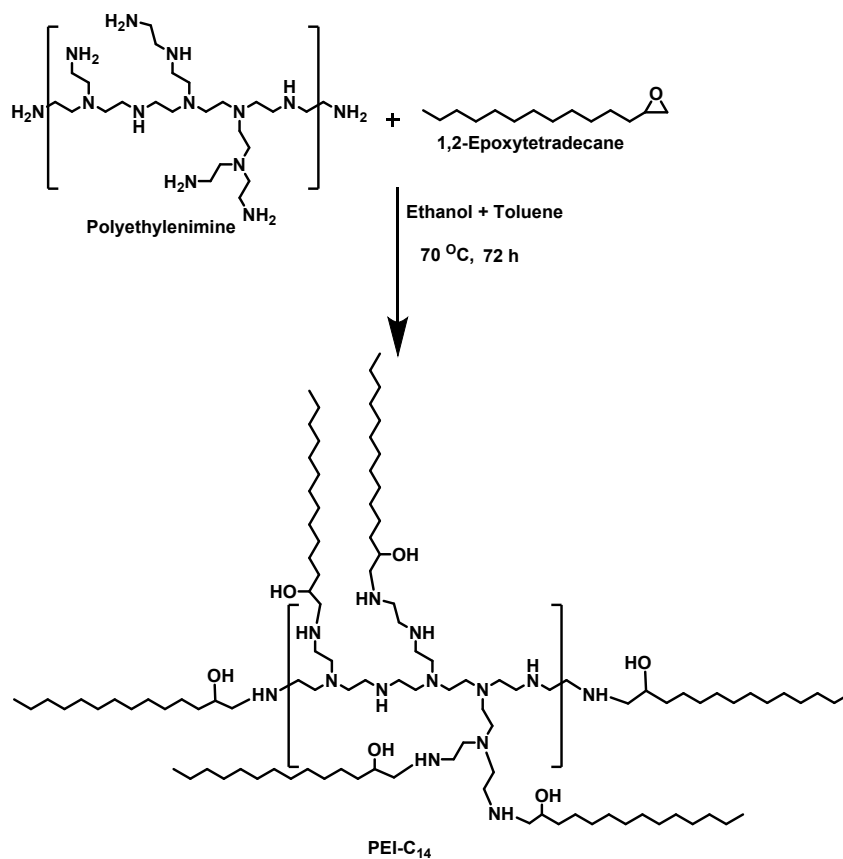

**Figure S1.** PEI-C<sub>14</sub> lipid synthetic route: epoxide ring opening by polyethylenimine in presence of ethanol and toluene solvents at 70 °C.

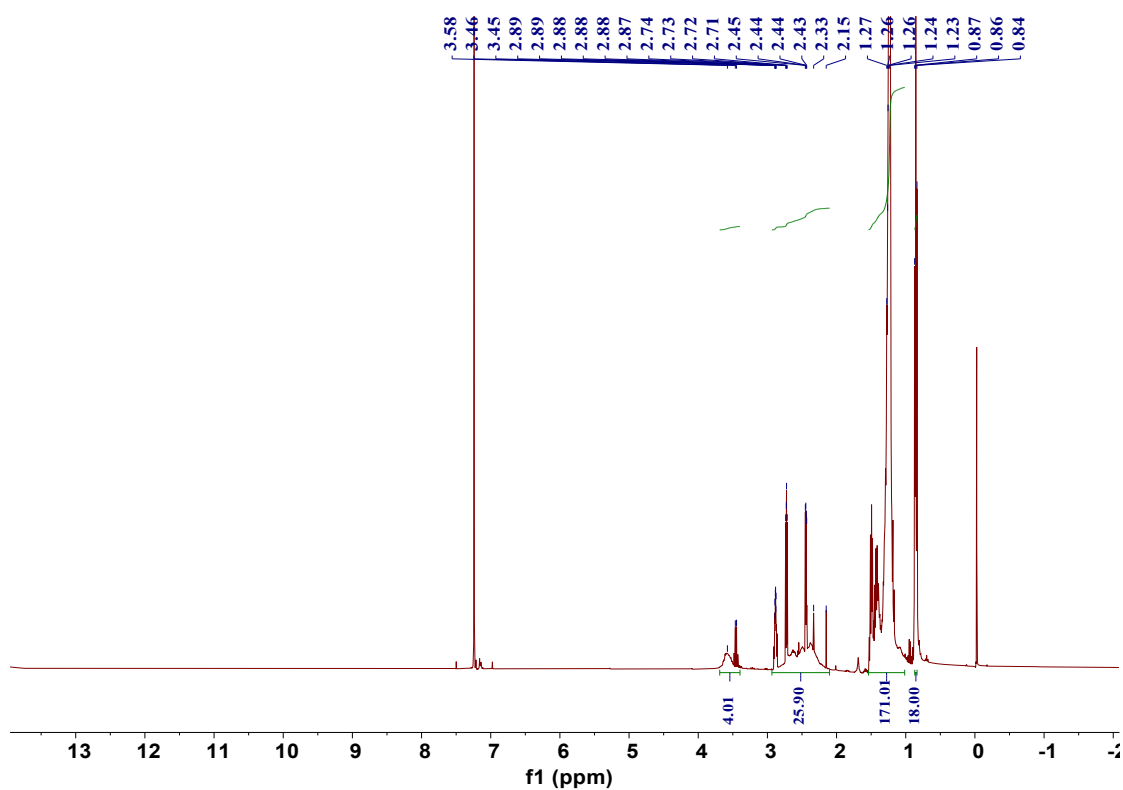

**Figure S2.** <sup>1</sup>H (400 MHz Bruker AVANCE) NMR Spectrum of PEI-C<sub>14</sub> lipid; <sup>1</sup>H NMR (400 MHz, CDCl<sub>3</sub>) δ 3.71 – 3.30 (m, 4H), 2.91 – 2.10 (m, 26H), 1.51-1.24 (d, m 171H), 0.92 – 0.76 (m, 18H).

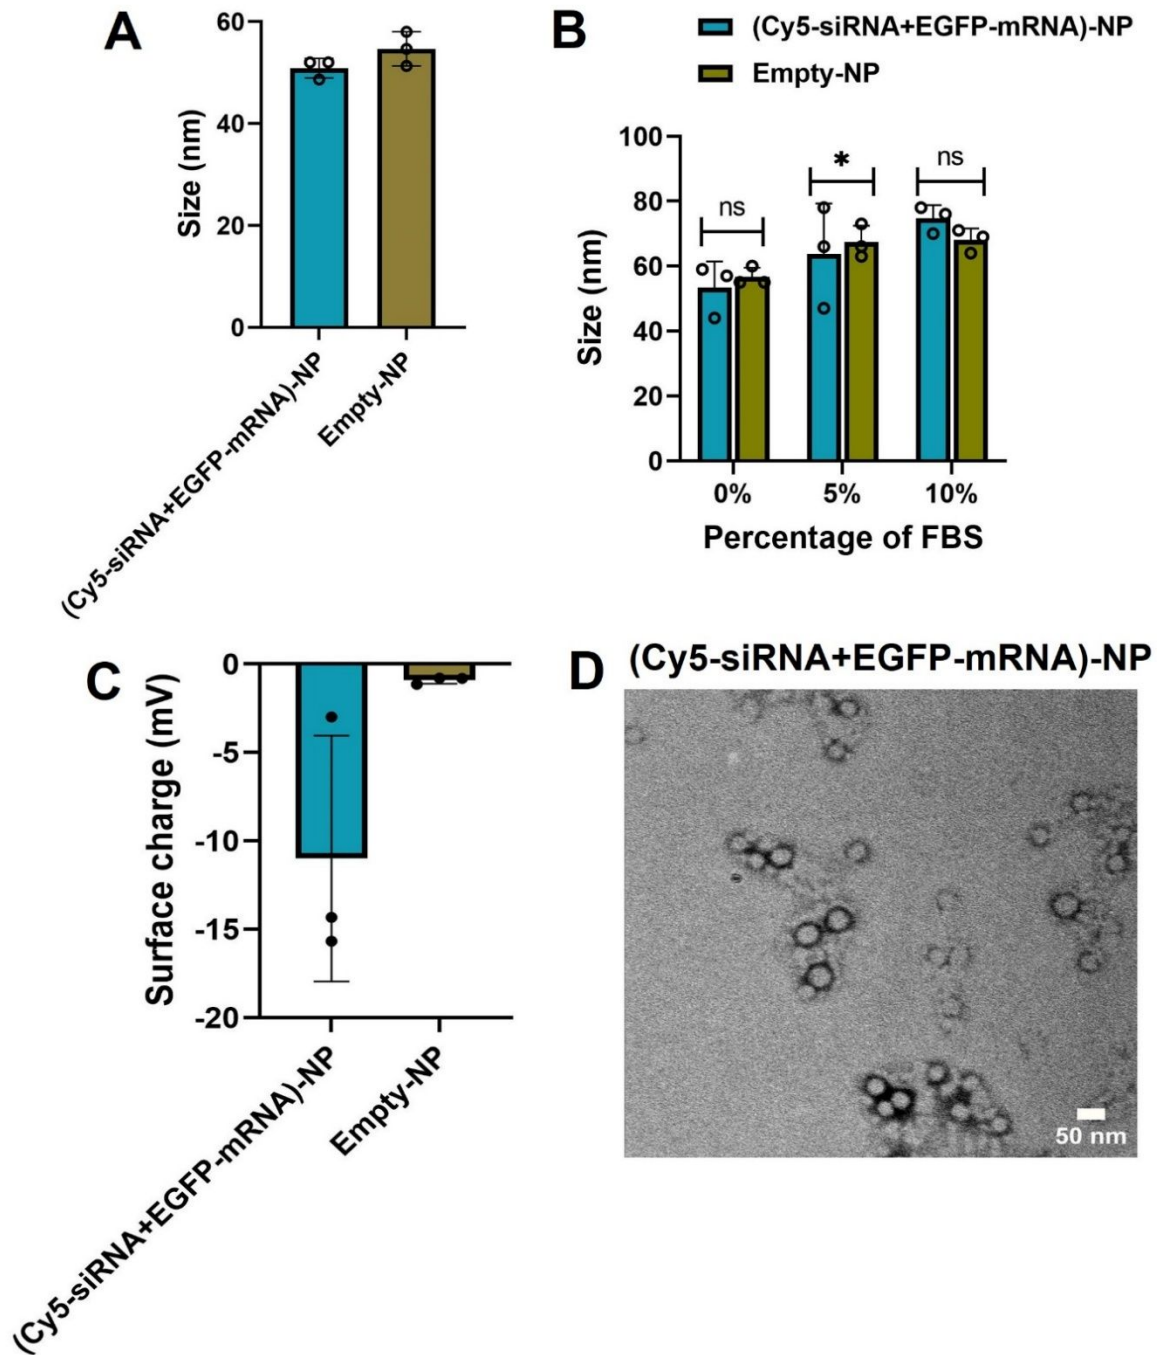

**Figure S3.** (A) Size of Cy5-siRNA+EGFP-mRNA-NPs along with control-NPs, measured by diluting 20  $\mu$ L of NP in 980  $\mu$ L sterile water using Dynamic light scattering n=3. (B) Stability of Cy5-siRNA+EGFP-mRNA-NPs in different percentages of FBS; NPs incubated for 6 hours and measured the size; n=3 (ns-no significant difference). (C) Surface of Cy5-siRNA+EGFP-mRNA-NPs along with control-NPs, measured by diluting 20  $\mu$ L of NP in 980  $\mu$ L sterile water using Dynamic light scattering n=3. (D) Size and morphology of Cy5-siRNA+EGFP-mRNA-NPs by transmission electron microscopy (scale bar-50 nm).

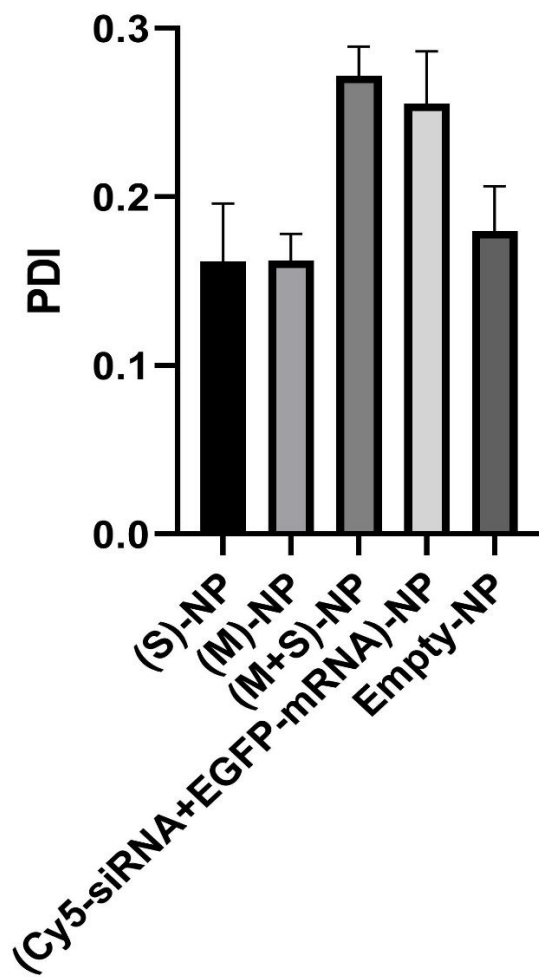

**Figure S4.** PDI (polydispersity index) of all single and dual NPs formulations analysed by DLS; n=3.

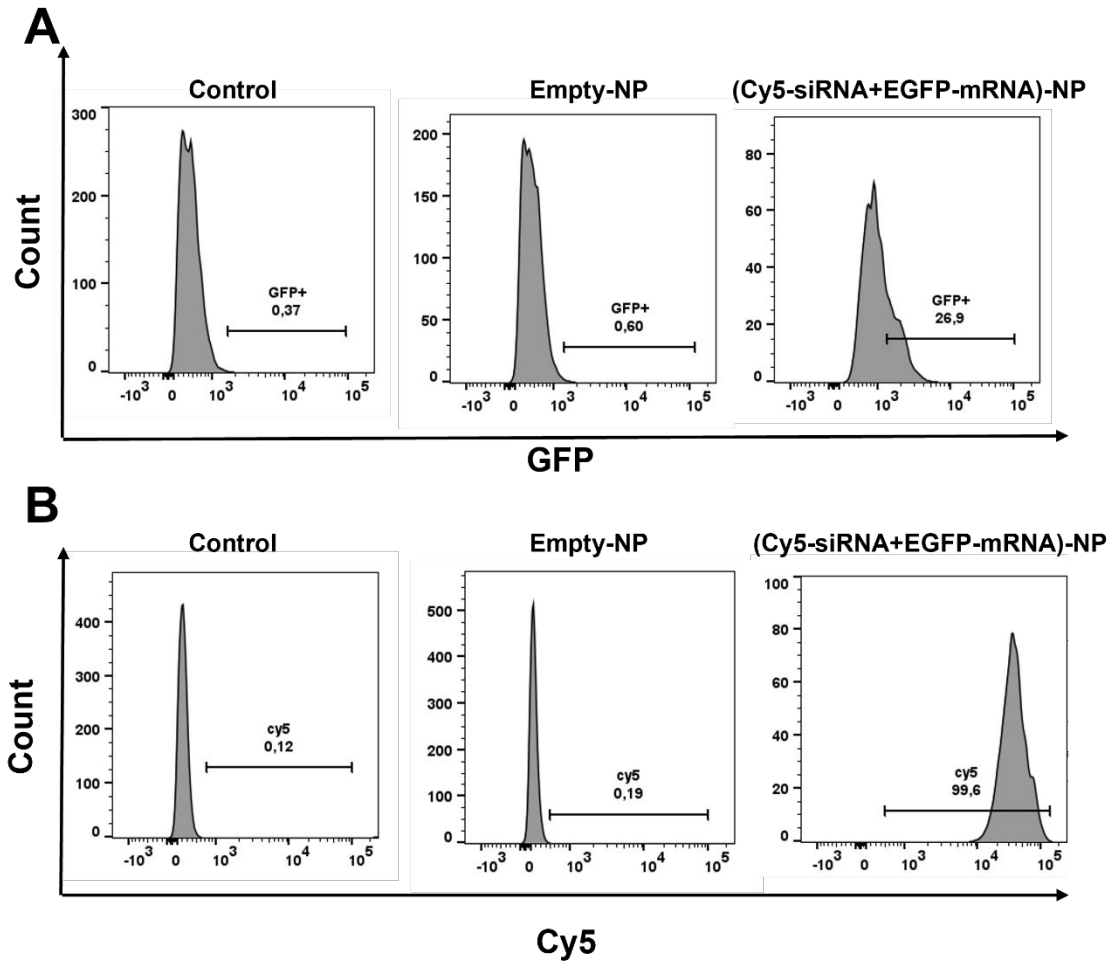

**Figure S5.** Representative flow cytometry histogram showing GFP (A) and Cy5 (B) expression in HT1080 cells after treated with (48 h post-treatment) Cy5-siRNA +EGFP-mRNA-NPs and Empty-NPs (control is non-treated).

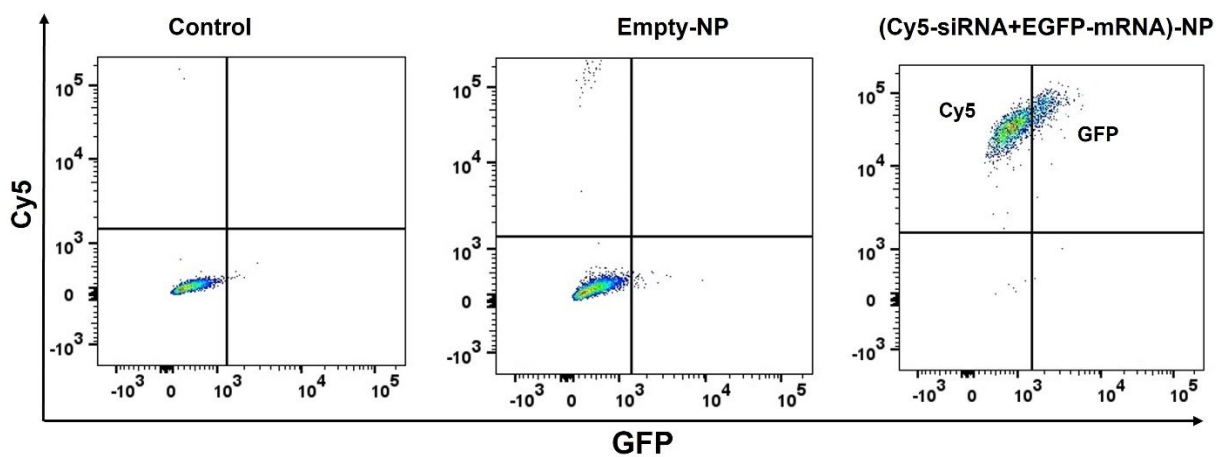

**Figure S6.** Cy5-siRNA+EGFP-mRNA-NPs or Empty-NPs treated to HT1080 cells. Representative flow cytometry histogram showing dual-drug in single plot, GFP population in x-axis and Cy5 population in y-axis; control is non-treated.

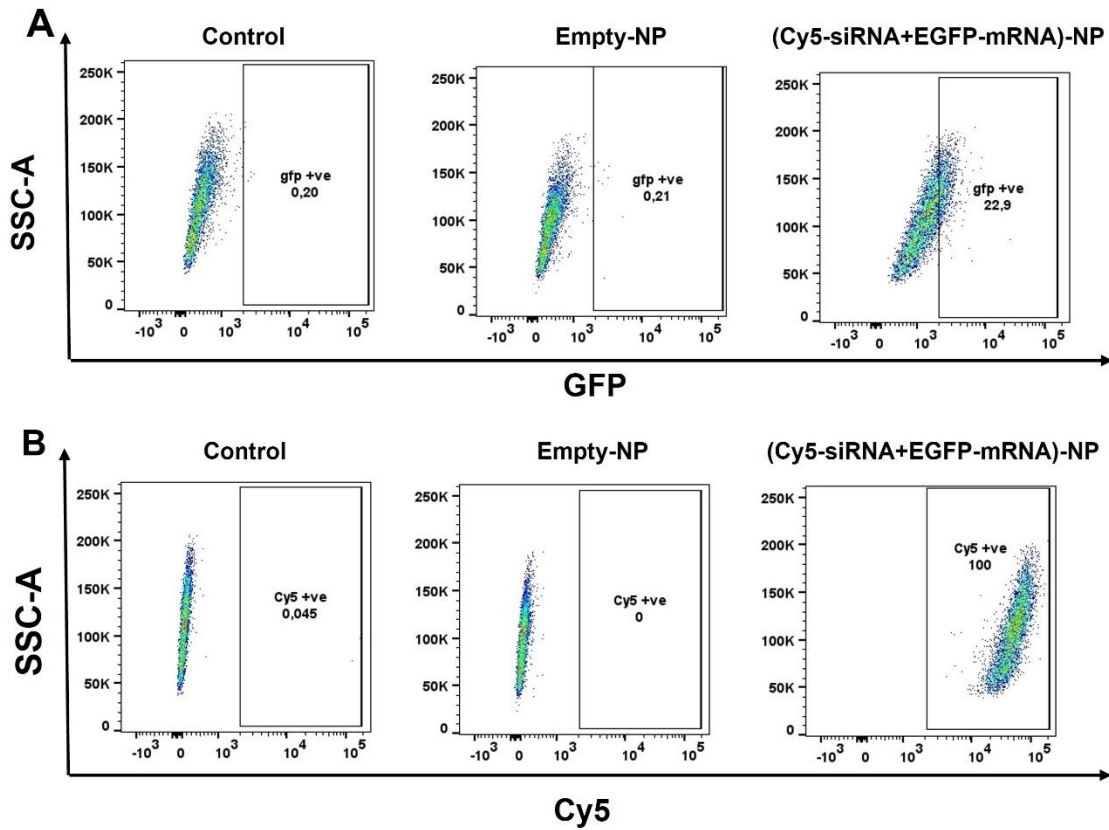

**Figure S7.** Representative flow cytometry SSC-A plots showing GFP (A), and Cy5 (B) expression in HT1080 cells 48 h post-treatment with Cy5-siRNA+EGFP-mRNA-NPs and Empty-NPs (control are non-treated).

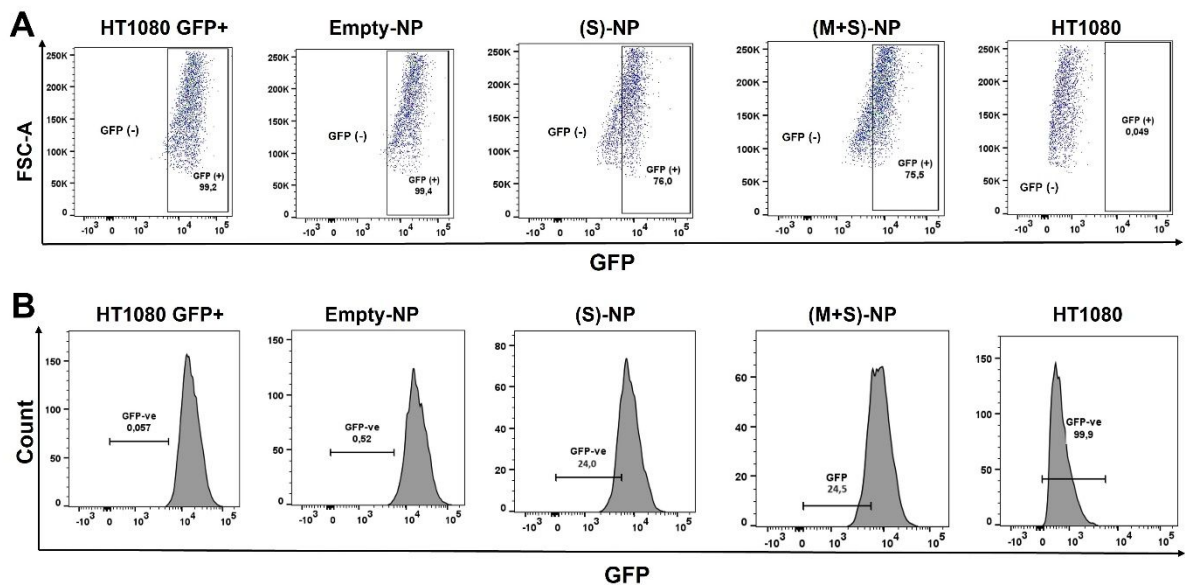

**Figure S8.** Single or dual-NPs along with Empty-NPs treated to HT1080 GFP (+) cells and 48 h post-treatment, the count of GFP knockdown was quantified by flow cytometry; (A) FSC-



A plots; (B) histograms representing count of GFP knockdown cells. HT1080 cells used as positive control.

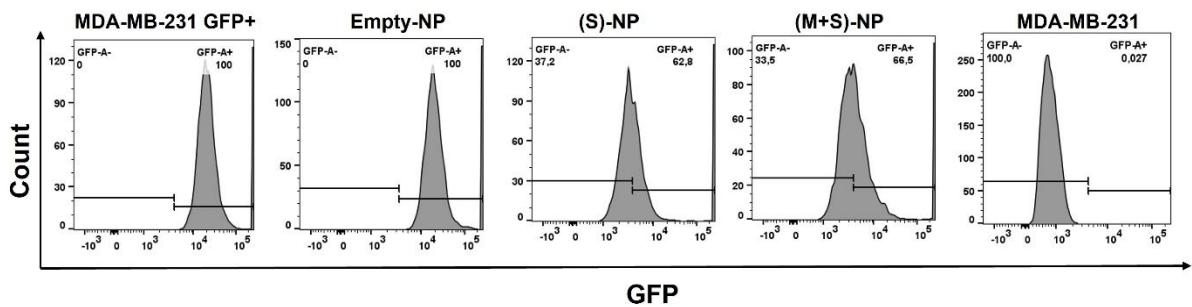

**Figure S9.** Single or dual-NPs along with Empty-NPs treated to MDA-MB-231 GFP (+) cells and 48 h post-treatment, the count of GFP knockdown was quantified by flow cytometry; histograms representing count of GFP knockdown cells. MDA-MB-231 cells used as positive control.

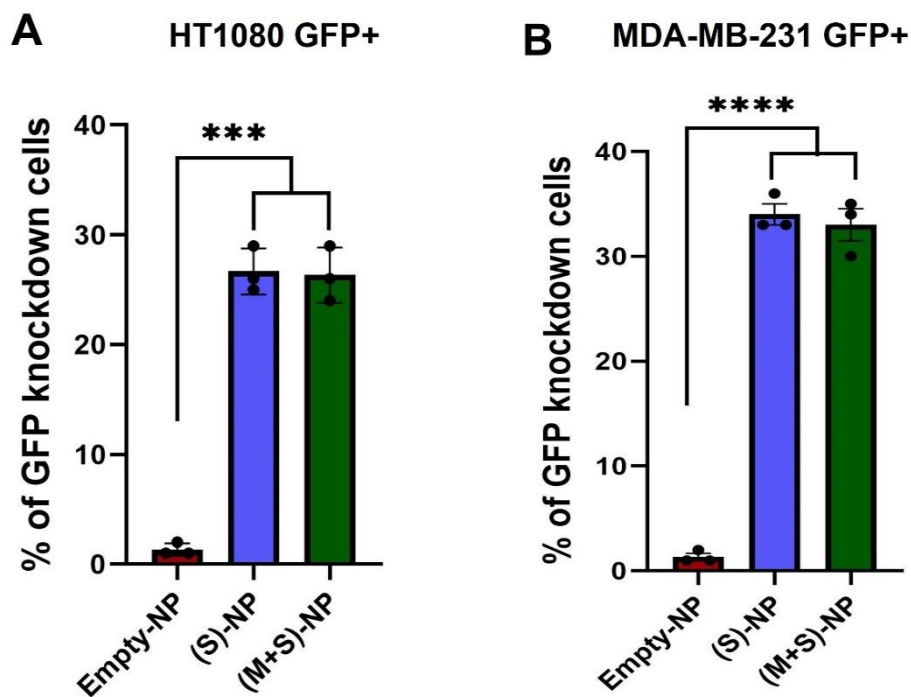

**Figure S10.** Percentage of GFP knockdown in (A) HT1080 GFP+ (B) MDA-MB-231 GFP+ was quantified with flow cytometry analysis; n=3 (Data represent means  $\pm$  SD, \*\*\*\*p < 0.0001 \*\*\*p < 0.001).

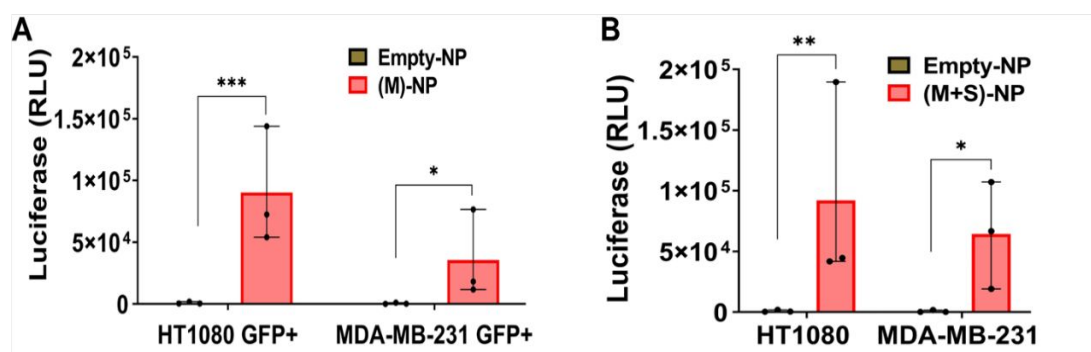

**Figure S11.** (A) Single drug (M)-NPs (0.016 nmol) and Empty-NPs (10  $\mu$ M) treated to HT1080 GFP+ and MDA-MB-231 GFP+ cells, and 48 h post-treatment luciferase (RLU) measured by plate reader n=3 (Data represent means  $\pm$  SD, \*p < 0.05 \*\*\*p < 0.001). (B) HT1080 and MDA-MB-231 cells treated with (M+S)-NPs co-loaded with siRNA-GFP (1 nmol) and Luc mRNA (0.016 nmol) for 48 h, luciferase (RLU) measured by plate reader n=3 (Data represent means  $\pm$  SD, \*p < 0.05 \*\*p < 0.01).

## References

1. Billingsley, M. M.; Singh, N.; Ravikumar, P.; Zhang, R.; June, C. H.; Mitchell, M. J. Ionizable Lipid Nanoparticle-Mediated mRNA Delivery for Human CAR T Cell Engineering. *Nano Lett* 2020, 20 (3), 1578-1589. DOI: 10.1021/acs.nanolett.9b04246 From NLM Medline
